# Supplementary material
Source: PubMed Central journal article supplement (PMC7666759)
Supplement: jamacardiol-e206210-s001.pdf [file jamacardiol-e206210-s001.pdf]

## Supplemental Online Content

Chan PS, Girotra S, Tang Y, Al-Araji R, Nallamothu BK, McNally B. Outcomes for out-of-hospital cardiac arrest in the United States during the coronavirus disease 2019 pandemic. *JAMA Cardiol*. Published online November 14, 2020.  
doi:10.1001/jamacardio.2020.6210

**eTable 1.** Rate of Bystander CPR in Non-Healthcare Facilities and Bystander AED Use in Public Locations.

**eTable 2.** Rates of Sustained ROSC During the 2020 Pandemic Period vs. 2019, Stratified by the County-Level COVID-19 Incidence Rate.

**eTable 3.** Rates of Termination of Resuscitation During the 2020 Pandemic Period vs. 2019, Stratified by the County-Level COVID-19 Mortality Rate.

**eTable 4.** Rates of Survival to Discharge During the 2020 Pandemic Period vs. 2019, Stratified by the County-Level COVID-19 Mortality Rate.

**eTable 5.** Comparison of 2020 vs. 2019 Outcomes During the Pre-Pandemic, Peri-Pandemic, and Pandemic Periods.

This supplemental material has been provided by the authors to give readers additional information about their work.

**eTable 1. Rate of Bystander CPR in Non-Healthcare Facilities and Bystander AED Use in Public Locations.** Rates for these bystander variables in subgroups of the main study cohort are shown below. A standardized difference of >10% denotes a significant difference between groups.

|                                                                     |                   |                   | <b>Standardized</b>  |
|---------------------------------------------------------------------|-------------------|-------------------|----------------------|
| <b>Variables</b>                                                    | <b>2019</b>       | <b>2020</b>       | <b>Difference, %</b> |
| <b>Bystander CPR</b>                                                |                   |                   |                      |
| <i>A. Overall Cohort</i>                                            |                   |                   |                      |
| Yes                                                                 | 46.8% (4418/9439) | 47.7% (4690/9839) | 1.7                  |
| Missing                                                             | 1                 | 24                |                      |
| <i>B. Excluding OHCA in nursing homes and healthcare facilities</i> |                   |                   |                      |
| Yes                                                                 | 40.2% (3198/7961) | 40.0% (3291/8231) | 0.4                  |
| Missing                                                             |                   | 23                |                      |
| <b>Bystander AED Use in Public Locations</b>                        |                   |                   |                      |
| Yes                                                                 | 12.5% (172/1371)  | 8.9% (77/868)     | 11.9                 |
| Missing                                                             |                   | 1                 |                      |

Abbreviations: AED, automated external defibrillator; CPR, cardiopulmonary resuscitation; OHCA, out-of-hospital cardiac arrest

**eTable 2. Rates of Sustained ROSC During the 2020 Pandemic Period vs. 2019, Stratified by the County-Level COVID-19 Mortality**

**Rate.** During the pandemic period, rates of sustained ROSC were lower in all communities including those with low COVID-19 mortality, when compared to the same period in 2019.

|                                                |                   |                   | <b>Adjusted RR</b> |                 | <b><i>P for</i></b>       |
|------------------------------------------------|-------------------|-------------------|--------------------|-----------------|---------------------------|
|                                                | <b>2019</b>       | <b>2020</b>       | <b>(95% CI)</b>    | <b><i>P</i></b> | <b><i>Interaction</i></b> |
| Overall Cohort                                 | 2816/9440 (29.8%) | 2265/9863 (23.0%) | 0.82 (0.78, 0.87)  | <0.001          |                           |
| <i>By County-Level Covid-19 Mortality Rate</i> |                   |                   |                    |                 | 0.03                      |
| 0-25 per 1,000,000                             | 740/2549 (29.0%)  | 583/2317 (25.2%)  | 0.89 (0.81, 0.98)  |                 |                           |
| 26-100 per 1,000,000                           | 1109/3532 (31.4%) | 889/3495 (25.4%)  | 0.85 (0.78, 0.93)  |                 |                           |
| 101-250 per 1,000,000                          | 470/1562 (30.1%)  | 358/1759 (20.4%)  | 0.75 (0.66, 0.85)  |                 |                           |
| 251-500 per 1,000,000                          | 305/1130 (27.0%)  | 286/1429 (20.0%)  | 0.79 (0.65, 0.97)  |                 |                           |
| >500 per 1,000,000                             | 192/667 (28.8%)   | 149/863 (17.3%)   | 0.67 (0.56, 0.80)  |                 |                           |

Abbreviations: CI, confidence interval; ROSC, return of spontaneous circulation; RR, rate ratio

**eTable 3. Rates of Termination of Resuscitation During the 2020 Pandemic Period vs. 2019, Stratified by the County-Level COVID-19 Mortality Rate.** During the pandemic period, rates of termination of resuscitation were higher in all communities including those with low COVID-19 mortality, when compared to the same period in 2019.

|                                                |                   |                   | <b>Adjusted RR</b> |          | <i>P for</i>       |
|------------------------------------------------|-------------------|-------------------|--------------------|----------|--------------------|
|                                                | <b>2019</b>       | <b>2020</b>       | <b>(95% CI)</b>    | <i>P</i> | <i>Interaction</i> |
| Overall Cohort                                 | 3768/9440 (39.9%) | 5314/9863 (53.9%) | 1.27 (1.23, 1.33)  | <0.001   |                    |
| <i>By County-Level Covid-19 Mortality Rate</i> |                   |                   |                    |          | <0.001             |
| 0-25 per 1,000,000                             | 1185/2549 (46.5%) | 1242/2317 (53.6%) | 1.12 (1.07, 1.18)  |          |                    |
| 26-100 per 1,000,000                           | 1296/3532 (36.7%) | 1689/3495 (48.3%) | 1.24 (1.16, 1.31)  |          |                    |
| 101-250 per 1,000,000                          | 603/1562 (38.6%)  | 921/1759 (52.4%)  | 1.27 (1.16, 1.40)  |          |                    |
| 251-500 per 1,000,000                          | 463/1130 (41.0%)  | 888/1429 (62.1%)  | 1.40 (1.26, 1.55)  |          |                    |
| >500 per 1,000,000                             | 221/667 (33.1%)   | 574/863 (66.5%)   | 1.83 (1.62, 2.05)  |          |                    |

Abbreviations: CI, confidence interval; RR, rate ratio

**eTable 4. Rates of Survival to Discharge During the 2020 Pandemic Period vs. 2019, Stratified by the County-Level COVID-19**

**Mortality Rate.** During the pandemic period, rates of survival to discharge were lower in communities with a COVID-19 mortality rate of more than 250 deaths per 1,000,000 residents. This outcome was restricted to EMS agencies with complete data on the outcome of survival to discharge.

|                                                |                  |                 | <b>Adjusted RR</b> |                 | <b><i>P</i> for</b>       |
|------------------------------------------------|------------------|-----------------|--------------------|-----------------|---------------------------|
|                                                | <b>2019</b>      | <b>2020</b>     | <b>(95% CI)</b>    | <b><i>P</i></b> | <b><i>Interaction</i></b> |
| Overall Cohort                                 | 332/3393 (9.8%)  | 239/3632 (6.6%) | 0.83 (0.69, 1.00)  | 0.048           |                           |
| <i>By County-Level Covid-19 Mortality Rate</i> |                  |                 |                    |                 | 0.049                     |
| 0-25 per 1,000,000                             | 82/788 (10.4%)   | 67/800 (8.4%)   | 0.96 (0.70, 1.32)  |                 |                           |
| 26-100 per 1,000,000                           | 131/1247 (10.5%) | 105/1194 (8.8%) | 1.04 (0.80, 1.35)  |                 |                           |
| 101-250 per 1,000,000                          | 59/474 (12.5%)   | 29/580 (5.0%)   | 0.54 (0.36, 0.79)  |                 |                           |
| 251-500 per 1,000,000                          | 28/371 (7.6%)    | 18/372 (4.8%)   | 0.71 (0.43, 1.20)  |                 |                           |
| >500 per 1,000,000                             | 32/513 (6.2%)    | 20/686 (2.9%)   | 0.67 (0.42, 1.05)  |                 |                           |

Abbreviations: CI, confidence interval; RR, rate ratio

**eTable 5. Comparison of 2020 vs. 2019 Outcomes During the Pre-Pandemic, Peri-Pandemic, and Pandemic Periods\*.** Rates of sustained ROSC and survival to discharge were lower during the pandemic period in 2020, as compared to the same time period in 2019. As additional controls for the pandemic period findings, there were no differences in rates of these outcomes during the pre-pandemic and peri-pandemic periods in 2020 vs. the same time periods in 2019.

|                                                | <u>Pre-Pandemic</u> |                    | <u>Peri-Pandemic</u> |                    | <u>Pandemic</u>    |                    |
|------------------------------------------------|---------------------|--------------------|----------------------|--------------------|--------------------|--------------------|
|                                                | <b>Adjusted RR</b>  | <b>Interaction</b> | <b>Adjusted RR</b>   | <b>Interaction</b> | <b>Adjusted RR</b> | <b>Interaction</b> |
| <b>SUSTAINED ROSC</b>                          | <b>(95% CI)</b>     | <b>P value</b>     | <b>(95% CI)</b>      | <b>P value</b>     | <b>(95% CI)</b>    | <b>P value</b>     |
| <i>By County-Level Covid-19 Mortality Rate</i> |                     | 0.96               |                      | 0.81               |                    | 0.03               |
| 0-25 per 1,000,000                             | 1.00 (0.92, 1.08)   |                    | 1.09 (0.91, 1.30)    |                    | 0.89 (0.81, 0.98)  |                    |
| 26-100 per 1,000,000                           | 0.97 (0.92, 1.03)   |                    | 1.00 (0.89, 1.13)    |                    | 0.85 (0.78, 0.93)  |                    |
| 101-250 per 1,000,000                          | 0.96 (0.89, 1.02)   |                    | 0.94 (0.77, 1.16)    |                    | 0.75 (0.66, 0.85)  |                    |
| 251-500 per 1,000,000                          | 0.97 (0.79, 1.20)   |                    | 0.95 (0.78, 1.16)    |                    | 0.79 (0.65, 0.97)  |                    |
| >500 per 1,000,000                             | 0.96 (0.82, 1.12)   |                    | 1.03 (0.70, 1.52)    |                    | 0.67 (0.56, 0.80)  |                    |
| <b>SURVIVAL TO DISCHARGE</b>                   |                     |                    |                      |                    |                    |                    |
| <i>By County-Level Covid-19 Mortality Rate</i> |                     | 0.24               |                      | 0.10               |                    | 0.049              |

|                       |                      |  |                      |  |                      |  |
|-----------------------|----------------------|--|----------------------|--|----------------------|--|
| 0-25 per 1,000,000    | 0.90 (0.72,<br>1.14) |  | 1.53 (0.83,<br>2.82) |  | 0.96 (0.70,<br>1.32) |  |
| 26-100 per 1,000,000  | 1.23 (1.04,<br>1.45) |  | 1.15 (0.78,<br>1.68) |  | 1.04 (0.80,<br>1.35) |  |
| 101-250 per 1,000,000 | 1.01 (0.73,<br>1.39) |  | 0.87 (0.44,<br>1.70) |  | 0.54 (0.36,<br>0.79) |  |
| 251-500 per 1,000,000 | 0.93 (0.65,<br>1.35) |  | 0.31 (0.12,<br>0.85) |  | 0.71 (0.43,<br>1.20) |  |
| >500 per 1,000,000    | 1.06 (0.71,<br>1.61) |  | 1.10 (0.52,<br>2.28) |  | 0.67 (0.42,<br>1.05) |  |

Abbreviations: CI, confidence interval; RR, rate ratio, ROSC, return of spontaneous circulation

\* Pre-pandemic period (January to February); Peri-pandemic period (March 1 to 15); Pandemic Period (March 16 to April)
